Reserved space. Do not place any text in this section. Include the mandatory author checklist or your manuscript will be returned. Use *continuous* line numbering in your manuscript.

1 **Article Summary Line:** Healthcare workers are hospitalized more frequently than non-  
2 healthcare workers when adjusting for age, sex, and comorbidities.

3 **Running Title:** Impact of COVID-19 on healthcare workers in the EU/EEA

4 **Keywords:** Health Personnel, COVID-19, Mortality, Public Health Surveillance, European  
5 Union

6 **Title:** Risk of hospitalization and risk of death for healthcare workers with COVID-19 in nine  
7 European Union/European Economic Area countries, January 2020–January 2021

8 **Authors:** Lisa Ferland, Joana Gomes Dias, Carlos Carvalho, Cornelia Adlhoch, Carl Suetens,  
9 Julien Beauté, Pete Kinross, Diamantis Plachouras, Favelle Lamb, Tuula Hannila-Handelberg,  
10 Massimo Fabiani, Flavia Riccardo, Joël Mossong, Anne Vergison, Rianne van Gageldonk-  
11 Lafeber, Anne Teirlinck, Jackie Melillo, Tanya Melillo, Piers Mook, Richard Pebody, Ana Paula  
12 Coutinho Rehse, Dominique L. Monnet

13 **Affiliations:**

14 European Centre for Disease Prevention and Control, Solna, Sweden (L. Ferland, J. Gomes Dias,  
15 C. Carvalho, C. Adlhoch, C. Suetens, J. Beauté, P. Kinross, D. Plachouras, F. Lamb, D.L.

16 Monnet)

17 Finnish Institute for Health and Welfare, Helsinki, Finland (T. Hannila-Handelberg)

18 Italian National Institute of Health, Rome, Italy (M. Fabiani, F. Riccardo)

19 Health Directorate, Luxembourg, Luxembourg (J. Mossong, A. Vergison)

20 National Institute for Public Health and the Environment, Bilthoven, The Netherlands (R. van

Reserved space. Do not place any text in this section. Include the mandatory author checklist or your manuscript will be returned. Use *continuous* line numbering in your manuscript.

21 Gageldonk-Lafeber, A. Terlinck)

22 Ministry for Health, Gwardamanga, Malta (J. Melillo, T. Melillo)

23 World Health Organization Regional Office for Europe, Copenhagen, Denmark (R. Pebody, P.

24 Mook, A. Coutinho Rehse)

## 25 **Abstract**

26 We assessed the impact of COVID-19 on healthcare workers (HCWs) from data on 2.9  
27 million cases reported from nine countries in the EU/EEA. Compared to non-HCWs, HCWs had  
28 a higher adjusted risk of hospitalization (IRR 3.0 [95% CI 2.2-4.0]), but not death (IRR 0.9, 95%  
29 CI 0.4-2.0).

## 30 **Text**

31 **Introduction:** The impact of the ongoing COVID-19 pandemic on healthcare workers  
32 (HCWs) has been unprecedented. HCWs are exposed to infected patients making them among  
33 the most affected professional groups [1-7], with nurses being the most infected [4]. In a meta-  
34 analysis of 97 studies that assessed infection among HCWs, 5% HCW COVID-19 cases had  
35 severe complications, and 0.5% died [8]. Using surveillance data provided by European Union  
36 and European Economic Area (EU/EEA) countries, we described the risk of disease,  
37 hospitalization, intensive care unit (ICU) admission, and death and identified possible risk  
38 factors for death in hospitalized HCW and non-HCW (general population) cases of COVID-19.

39 **Methods:** COVID-19 surveillance in the World Health Organization (WHO) European  
40 Region is jointly coordinated by the European Centre for Disease Prevention and Control  
41 (ECDC) and the WHO Regional Office for Europe. Using case-based surveillance data reported

Reserved space. Do not place any text in this section. Include the mandatory author checklist or your manuscript will be returned. Use *continuous* line numbering in your manuscript.

42 to The European Surveillance System (TESSy), we analyzed the risk of disease, hospitalization,  
43 ICU admission, and death among HCWs and non-HCWs using case-to-case study design [8].  
44 Cases with unknown HCW status were assumed to be non-HCWs. All cases with unknown  
45 outcome status were recorded as ‘alive’ to avoid overestimating death.

46 We included all COVID-19 cases aged 20-69 years (working ages) reported to TESSy  
47 between January 31, 2020 and January 13, 2021 from countries that had (a) consistent case-based  
48 reporting throughout the COVID-19 pandemic (n=15) [9], (b) at least 50% of cases reported as  
49 case-based data in TESSy, and (c) at least 40% internal completeness of HCW status [10]. We  
50 estimated the crude and adjusted rates for disease, hospitalization, admission to ICU, and death  
51 by HCW status using negative binomial regression and accounting for country reporting  
52 heterogeneity. We used the total number of HCWs in 2020 by country using the latest HCW  
53 population statistics from Eurostat [11] for denominator values in Table 1. We subtracted the  
54 HCW population<sup>1</sup> from the 2020 population statistics from Eurostat [12] to calculate the non-  
55 HCW population.

56 As HCWs are tested more frequently than non-HCWs (risk of detection bias), we  
57 estimated incidence rate ratios (IRRs) and 95% confidence intervals (CIs) for death for only  
58 hospitalized cases using negative binomial regression, adjusting for age group (20-29, 30-39, 40-  
59 49, 50-59, and 60-69 years), sex, comorbidities<sup>2</sup>, and three reporting periods (January 31 to May  
60 31, 2020, June 1 to September 30, 2020, and October 1, 2020 to January 13, 2021). We included  
61 the time variable in the model to control for differences in testing, reporting, and healthcare  
62 capacity during the pandemic. To account for country reporting heterogeneity, we calculated  
63 adjusted IRRs using robust clustered standard errors with reporting countries as a cluster effect in

Reserved space. Do not place any text in this section. Include the mandatory author checklist or your manuscript will be returned. Use *continuous* line numbering in your manuscript.

64 the negative binomial regression model. The level of statistical significance was  $p < 0.05$  and the  
65 analyses were performed using Stata 16 and R 3.6.2.

66 **Results:** Nine countries met our inclusion criteria: Austria, Finland, Ireland, Italy,  
67 Luxembourg, Malta, the Netherlands, Norway, and Slovakia. These countries (70 million total  
68 population aged 20-69, 2.6 million HCWs) reported a total of 2.9 million cases from January 31,  
69 2020 to January 13, 2021, corresponding to an overall attack rate of 4.1%. The proportion of  
70 HCW cases in the first reporting period (28%) differed greatly from reporting periods later in the  
71 pandemic (7.7%-7.5%) (Table 1). The attack rate in the population aged 20-69 was 10.1% for  
72 HCWs and 3.9% for non-/unknown-HCWs (Table 1), corresponding to a crude IRR of 2.6 and  
73 an adjusted IRR of 3.0 (95% CI 2.2-4.0) for HCWs. The adjusted risk of COVID-19 requiring  
74 hospitalization or admission to ICU was respectively 1.8 and 1.9 times higher in HCWs than in  
75 non-HCWs (95% CIs 1.2-2.7 and 1.1-3.2, respectively), but the adjusted risk of death was not  
76 significantly different (adjusted IRR 0.9, 95% CI 0.4-2.0).

77 Of 127,712 hospitalized cases aged 20-69 years, 8,169 (6.4%) were HCWs and 119,543  
78 (93.6%) non-HCWs (Table 1). Of those hospitalized, 147 (1.8%) HCWs died, compared to 9,773  
79 (8.2%) non-HCWs (Table 2).

80 Hospitalized HCWs had a lower risk of in-hospital death (IRR 0.3 [95% CI 0.2-0.6]), but  
81 this effect was halved for HCWs admitted to an ICU (IRR 0.6 [95% CI 0.4-0.9]) (Table 2).

82 ICU admission was an independent predictor of death after hospitalization (IRR 4.6 [95%  
83 CI 2.7-7.7]), which likely reflects risk factors for severity of disease that were not included in the  
84 model (Table 2). Being 60-69 years old compared to cases aged 20-29 (IRR 5.8 [95% CI 3.8-  
85 8.8]), having at least one comorbidity (IRR 2.0 [95% CI 1.8-2.3]) or being male (IRR 1.3 [95%

Reserved space. Do not place any text in this section. Include the mandatory author checklist or your manuscript will be returned. Use *continuous* line numbering in your manuscript.

86 CI 1.1-1.5]) was associated with increased risk of death among hospitalized cases (Table 2).  
87 Being hospitalized between June-September 2020 was associated with a decreased risk of death  
88 (IRR 0.5 [95% CI 0.4 to 0.7]) compared to the early phase of the pandemic. There was no  
89 increased risk of death based on the number of comorbidities for either hospitalized HCWs or  
90 hospitalized non-HCWs.

91 **Discussion:** In our analyses, HCWs in all countries were at increased risk of COVID-19-  
92 related hospitalization, suggesting an increased risk of exposure to SARS-CoV-2. However,  
93 HCWs may seek and receive care earlier than non-HCWs, thereby impacting hospitalization and  
94 survival rates. By restricting analyses to cases requiring hospitalization, we limited the effect of  
95 differential underdiagnosis of cases in non-HCWs vs. HCWs who are regularly tested in  
96 healthcare settings.

97 HCWs were less likely than non-HCWs to die following hospitalization. Risk factors for  
98 death such as sex, age, and comorbidity reflect what has been previously reported [13]. After  
99 May 31, 2020, there was a lower risk of dying in the hospital for all COVID-19 cases than during  
100 the initial phase of the pandemic. Testing practices changed over time and the availability of  
101 better equipment, knowledge, and treatment of cases most likely influenced health outcomes for  
102 all cases. During the second and third reporting periods, the decreased risk of death may be  
103 linked to improved management of severe cases [14].

104 In addition, it is plausible that HCWs, because they are close to the healthcare system,  
105 receive early treatment and are better able to identify clinical symptoms that can lead to severe  
106 outcomes that affected their survival rates. HCWs in our analyses may also have benefited from

Reserved space. Do not place any text in this section. Include the mandatory author checklist or your manuscript will be returned. Use *continuous* line numbering in your manuscript.

107 the healthy worker effect [15] or HCWs with high-risk comorbidities may have left the practice  
108 during the pandemic.

109 While we tried to control for detection bias by restricting our multivariable analysis to  
110 hospitalized cases, it is possible that HCWs were hospitalized with less severe illness than non-  
111 HCWs. Country-specific definitions of HCWs vary and we did not have data on the professions  
112 of HCW cases, so their distribution and data completeness in our surveillance dataset is  
113 unknown. While misclassification of cases (either as non-HCWs or as alive) was possible, the  
114 adjusted IRRs did not change when we restricted the analysis to only cases with known HCW  
115 and outcome statuses.

116 In conclusion, HCWs were at higher risk for COVID-19-related hospitalization than non-  
117 HCWs, which could possibly be explained by their proximity to healthcare services and prompt  
118 recognition of illness. Among hospitalized cases, the risk of death was lower for HCWs than for  
119 non-HCWs, likely due to the healthy worker effect, better or earlier access to treatment, and  
120 under ascertainment. Further research is needed on exposure levels by HCW profession to fully  
121 explore the risk factors for COVID-19-related hospitalization and death among HCWs.

122

## 123 **Acknowledgments**

124 We would like to gratefully acknowledge all the contributing public health practitioners  
125 who provided data used in this manuscript. We would also like to acknowledge the contributions  
126 of Gianfranco Spiteri, Nick Bundle, Pasi Penttinen, Andrew J Amato-Gauci, Karl Ekdahl,  
127 Antonino Bella, and all ECDC employees and staff who helped collect, analyze, and report these  
128 data during the public health emergency response. We would like to acknowledge the

Reserved space. Do not place any text in this section. Include the mandatory author checklist or your manuscript will be returned. Use *continuous* line numbering in your manuscript.

129 contributions of all public health practitioners in EU/EEA countries conducting surveillance and  
130 reporting data related to COVID-19. ECDC continues to collect surveillance data and collaborate  
131 with the WHO to monitor risk factors and advise EU/EEA countries on the severity of disease as  
132 the pandemic progresses.

### 133 **Disclaimers**

134 The authors alone are responsible for the views expressed in this publication and they do  
135 not necessarily represent the decisions or policies of the institutions with which they are  
136 affiliated. Data are publicly available through <https://www.ecdc.europa.eu>.

### 137 **Author Bio**

138 Lisa Ferland, MPH, is an interim surveillance expert at the European Centre for Disease  
139 Prevention and Control with a primary interest in surveillance of infectious diseases and public  
140 health workforce capacity and competency.

### 141 **Footnotes**

142 <sup>1</sup> HCW professional categories included: (i) medical doctors, (ii) nursing and midwifery, (iii)  
143 dentistry, (iv) pharmaceutical, (v) environmental and occupational health and hygiene personnel,  
144 (vi) medical and pathology laboratory personnel, (vii) physiotherapy personnel, (viii) traditional  
145 and complementary medicine personnel, and (ix) community HCWs.

146 <sup>2</sup> Comorbidities included asthma, cancer, cardiac disease, diabetes, HIV, hypertension, kidney  
147 disease, liver disease, lung disease, neuromuscular disease, obesity, pregnancy, smoking status,  
148 tuberculosis, and other/unspecified.

149

Reserved space. Do not place any text in this section. Include the mandatory author checklist or your manuscript will be returned. Use *continuous* line numbering in your manuscript.

## 150 **References**

- 151 1. Nguyen, LH, Drew DA, Graham MS, Joshi AD, Guo CG, Ma W, et al. Risk of COVID-  
152 19 among front-line health-care workers and the general community: a prospective cohort  
153 study. *The Lancet*. 2020;5:e475-e483.
- 154 2. Mutambudzi M, Niedzwiedz CL, Macdonald EB, Leyland AH, Mair FS, Anderson JJ, et  
155 al. Occupation and risk of severe COVID-19: prospective study of 120,075 UK Biobank  
156 participants. *Occupational and Environmental Medicine*, 2020;0:1-8.
- 157 3. European Centre for Disease Prevention and Control. COVID-19 clusters and outbreaks  
158 in occupational settings in the EU/EEA and the UK. ECDC. 2020.
- 159 4. Bandyopadhyay S, Baticulon RE, Kadhum M, et al. Infection and mortality of healthcare  
160 workers worldwide from COVID-19: a systematic review. *BMJ Global  
161 Health*. 2020;5:e003097.
- 162 5. Barrett ES, Horton DB, Roy J, Gennaro ML, Brooks A, Tischfield J, et al. Prevalence of  
163 SARS-CoV-2 infection in previously undiagnosed health care workers in New Jersey, at  
164 the onset of the U.S. COVID-19 pandemic. *BMC Infect Dis*. 2020; 20, 853.
- 165 6. Gómez-Ochoa SJ, Franco OH, Rojas LZ, Raguindin PF, Roa-Diaz ZM, Wyssmann BM,  
166 et al. COVID-19 in Health-Care Workers: A Living Systematic Review and Meta-  
167 Analysis of Prevalence, Risk Factors, Clinical Characteristics, and Outcomes, *American  
168 Journal of Epidemiology*. 2021;190:161-175.
- 169 7. Shah SV, Wood R, Gribben C, Caldwell D, Bishop J, Weir A, et al. Risk of hospital  
170 admission with coronavirus disease 2019 in healthcare workers and their households:  
171 nationwide linkage cohort study, *BMJ*. 2020;371:m3582.



Reserved space. Do not place any text in this section. Include the mandatory author checklist or your manuscript will be returned. Use *continuous* line numbering in your manuscript.

- 172 8. Pogreba-Brown K, Austhof E, Ellingson K. Methodology minute: An overview of the  
173 case-case study design and its applications in infection prevention. American Journal of  
174 Infection Control. 2020. 48;342-344.
- 175 9. European Centre for Disease Prevention and Control. COVID-19 surveillance report  
176 introduction. 2020-2021 [cited 2021 Jan 20]. Available from: [https://covid19-](https://covid19-surveillance-report.ecdc.europa.eu/#1_Introduction)  
177 [surveillance-report.ecdc.europa.eu/#1\\_Introduction](https://covid19-surveillance-report.ecdc.europa.eu/#1_Introduction)
- 178 10. European Centre for Disease Prevention and Control. COVID-19 surveillance report  
179 introduction. 2020-2021 [cited 2021 Jan 20]. Available from:  
180 <https://www.ecdc.europa.eu/en/covid-19/surveillance/weekly-surveillance-report>
- 181 11. Eurostat. Health care staff including health personnel, nursing and caring professionals,  
182 physicians, and health personnel (excluding nursing and caring professionals). 2018.  
183 [data extracted 18 January 2021]. Available from:  
184 <https://ec.europa.eu/eurostat/web/health/data/database>
- 185 12. Eurostat. EUROPOP2019 Population projection at national level (2019-2100) (proj\_19n).  
186 2019 [cited 2021 Jan 20]. Available from:  
187 <https://ec.europa.eu/eurostat/web/main/data/database>.
- 188 13. Flavia R, Marco A, Xanthi AD, Antonino B, Martina DM, Massimo F, et al.  
189 Epidemiological characteristics of COVID-19 cases and estimates of the reproductive  
190 numbers 1 month into the epidemic, Italy, 28 January to 31 March 2020,  
191 Eurosurveillance. 2020. 25(49).
- 192 14. Heidi Ledford. Why do COVID death rates seem to be falling? Nature. 2020. [cited 18  
193 February 2021]. Available from: <https://www.nature.com/articles/d41586-020-03132-4>

Reserved space. Do not place any text in this section. Include the mandatory author checklist or your manuscript will be returned. Use *continuous* line numbering in your manuscript.

194 15. C.-Y. Li, F.-C. Sung, A review of the healthy worker effect in occupational  
195 epidemiology, Occupational Medicine, Volume 49, Issue 4, May 1999, Pages 225–229.  
196 Available from: C.-Y. Li, F.-C. Sung, A review of the healthy worker effect in  
197 occupational epidemiology, Occupational Medicine, Volume 49, Issue 4, May 1999,  
198 Pages 225–229, <https://doi.org/10.1093/occmed/49.4.225>

199 Address for correspondence: Lisa Ferland, European Centre for Disease Prevention and  
200 Control, Gustav III:s boulevard 40, 169 73 Solna, Sweden; email:  
201 [lisa.ferland@ecdc.europa.eu](mailto:lisa.ferland@ecdc.europa.eu);

Reserved space. Do not place any text in this section. Include the mandatory author checklist or your manuscript will be returned. Use *continuous* line numbering in your manuscript.

202 Table 1. Number of COVID-19 cases reported from case-based surveillance and COVID-19 attack rate by period, healthcare worker  
 203 status and outcome, EU/EEA countries†, January 2020 — January 2021\*

| Reporting period                         |                 | Reported cases |         |           | Hospitalized cases‡ |           | Cases admitted to ICU‡ |           | Deceased |           |
|------------------------------------------|-----------------|----------------|---------|-----------|---------------------|-----------|------------------------|-----------|----------|-----------|
|                                          |                 | Total          | HCWs    | Non-HCWs§ | HCWs                | Non-HCWs§ | HCWs                   | Non-HCWs§ | HCWs     | Non-HCWs§ |
| Overall<br>(Jan 31, 2020 – Jan 13, 2021) | No.             | 2,918,100      | 261,080 | 2,657,020 | 8,169               | 119,543   | 716                    | 16,946    | 220      | 13,857    |
|                                          | Attack rate (%) | 4.1            | 10.1    | 3.9       | 0.40                | 0.21      | 0.03                   | 0.03      | 0.01     | 0.02      |
| Jan 31, 2020 – May 31, 2020              | No.             | 209,993        | 58,734  | 151,259   | 4,557               | 40,139    | 387                    | 6,371     | 102      | 6,120     |
|                                          | Attack rate (%) | 0.3            | 2.3     | 0.2       | 0.22                | 0.07      | 0.019                  | 0.011     | 0.004    | 0.009     |
| Jun 1, 2020 – Sep 30, 2020               | No.             | 174,072        | 13,435  | 160,637   | 265                 | 7,714     | 18                     | 673       | 7        | 340       |
|                                          | Attack rate (%) | 0.2            | 0.5     | 0.2       | 0.01                | 0.01      | 0.001                  | 0.001     | 0.000    | 0.001     |
| Oct 1, 2020 – Jan 13, 2021               | No.             | 2,534,035      | 188,911 | 2,345,124 | 3,347               | 71,690    | 311                    | 9,902     | 111      | 7,397     |
|                                          | Attack rate (%) | 3.6            | 7.3     | 3.5       | 0.16                | 0.13      | 0.015                  | 0.017     | 0.004    | 0.011     |

204 \*EU/EEA, European Union and Economic Area; HCWs, healthcare workers; ICU, intensive care unit; TESSy, The European  
 205 Surveillance System.

206 †Nine EU/EEA countries with consistent reporting case-based surveillance data reported to TESSy for cases aged 20-69 years:  
 207 Austria, Finland, Ireland, Italy, Luxembourg, Malta, the Netherlands, Norway, and Slovakia. Consistent reporting was defined as  
 208 reporting case-based surveillance data throughout the entire study period of January 2020-January 2021.

Reserved space. Do not place any text in this section. Include the mandatory author checklist or your manuscript will be returned. Use *continuous* line numbering in your manuscript.

- 209 ‡One country (the Netherlands) was excluded as data on hospitalizations and ICU admissions were incomplete or not reported.
- 210 §Non-HCWs include cases with unknown HCW status.

Table 2. Number of hospitalized COVID-19 cases and risk of death (IRR) by characteristics of cases, EU/EEA countries†, January 31, 2020-January 13, 2021\*

| Characteristic               | No. hospitalized cases<br>(% within stratum) |                | Number of deaths (%) |              | IRR  | 95% CI    |
|------------------------------|----------------------------------------------|----------------|----------------------|--------------|------|-----------|
|                              | HCWs                                         | Non-HCWs       | HCWs                 | Non-HCWs     |      |           |
| HCW and ICU admission        |                                              |                |                      |              |      |           |
| Non-HCW, not admitted to ICU | --                                           | 102,597 (80.3) | --                   | 4,823 (4.7)  | Ref. | --        |
| Non-HCW, admitted to ICU     | --                                           | 7,453 (5.8)    | --                   | 4,950 (29.2) | 4.6  | 2.7-7.7   |
| HCW, not admitted to ICU     | 16,946 (13.3)                                | --             | 48 (0.6)             | --           | 0.30 | 0.2-0.6   |
| HCW, admitted to ICU         | 716 (0.6)                                    | --             | 99 (13.8)            | --           | 0.62 | 0.4-0.9   |
| Sex                          |                                              |                |                      |              |      |           |
| Female                       | 5,180 (59.5)                                 | 45,747 (36.5)  | 34 (0.7)             | 2 537 (5.8)  | Ref. | --        |
| Male                         | 3,529 (40.5)                                 | 79,561 (63.5)  | 113 (3.3)            | 7 236 (9.5)  | 1.3  | 1.1-1.5   |
| Age group, y                 |                                              |                |                      |              |      |           |
| 20-29                        | 545 (6.3)                                    | 6,834 (5.5)    | (0.0)                | 44 (0.7)     | Ref. | --        |
| 30-39                        | 1,154 (13.2)                                 | 11,059 (8.8)   | 2 (0.2)              | 149 (1.4)    | 1.6  | 1.0-2.6   |
| 40-49                        | 2,070 (23.8)                                 | 19,731 (15.7)  | 12 (0.6)             | 561 (3.0)    | 2.1  | 1.3-3.2   |
| 50-59                        | 3,245 (37.3)                                 | 38,259 (30.5)  | 42 (1.4)             | 2,274 (6.2)  | 3.0  | 2.0-4.6   |
| 60-69                        | 1,697 (19.5)                                 | 49,435 (39.4)  | 91 (5.8)             | 6,745 (14.4) | 5.8  | 3.8-8.8   |
| Any comorbidity              |                                              |                |                      |              |      |           |
| No                           | 7,196 (82.6)                                 | 101,260 (80.8) | 89 (1.3)             | 6,347 (6.6)  | Ref. | --        |
| Yes‡                         | 1,515 (17.4)                                 | 24,058 (19.2)  | 58 (3.8)             | 3,426 (14.2) | 2.0  | 1.8-2.3   |
| Reporting period             |                                              |                |                      |              |      |           |
| Jan 31, 2020 – May 31, 2020  | 5,086 (58.4)                                 | 45,646 (36.4)  | 83 (1.8)             | 4,520 (11.3) | Ref. | --        |
| Jun 1, 2020 – Sep 30, 2020   | 278 (3.2)                                    | 7,980 (6.4)    | 4 (1.5)              | 212 (2.7)    | 0.53 | 0.42-0.67 |
| Oct 1, 2020 – Jan 13, 2021   | 3,347 (38.4)                                 | 71,692 (57.2)  | 60 (1.8)             | 5,041 (7.0)  | 0.83 | 0.71-0.96 |

\*EU/EEA, European Union and European Economic Area; HCWs, healthcare workers;

IRR, incidence rate ratio; CI, confidence interval.

†Eight EU/EEA countries with consistent reporting case-based surveillance data reported to TESSy for hospitalized cases aged 20-69 years, including ICU admission: Austria, Finland, Ireland, Italy, Luxembourg, Malta, Norway, and Slovakia. Consistent reporting was defined as reporting case-based surveillance data throughout the entire study period of January 2020-January 2021.

‡Presence of at least one of the following: asthma, cancer, cardiac disease, diabetes, HIV, hypertension, kidney disease, liver disease, lung disease, neuromuscular disease, obesity, pregnancy, smoking status, tuberculosis, and other/unspecified.
